# Supplementary material for: Effects of mother-infant skin-to-skin contact on severe latch-on problems in older infants: a randomized trial
Source: Springer Nature journal article supplement (doi:10.1186/1746-4358-8-1), 2013-03-01
Supplement: 13006_2010_152_MOESM1_ESM.pdf [file 13006_2010_152_MOESM1_ESM.pdf]

## Enrollment

**Screening: 230** mothers contacted researchers for participation.

**Excluded (n=127)**  
Not meeting  
inclusion criteria

**Randomized: 103** mother-infant pairs were randomized  
to experimental group or control group

## Allocation

**Experimental group (n=53)**  
(skin-to-skin contact)

**Control group (n=50)**  
(no skin-to-skin contact)

## Analysis for regular latching and Breastfeeding Emotional and Physical Pain scale

**n=53**

40 mother-infant pairs latched regularly  
13 infants did not latch regularly

**n=50**

43 mother-infant pairs latched regularly  
7 infants did not latch regularly

## Analysis for time to establish regular latching

**n=31**

9 mothers who started to breastfeed could not  
identify time point for regular latching \*

**n=33**

10 mothers who started to breastfeed could  
not identify time for regular latching \*

## Analysis for Breastfeeding 4 months after inclusion

**n=28**

3 mothers could not be located

**n=27**

4 mothers could not be located

## Analysis for Breastfeeding Emotional and Physical Pain Scales 4 months after inclusion

**n= 21**

7 infants were not interested in breastfeeding  
during the visit

**n=20**

7 infants were not interested in breastfeeding  
during the visit

\* These 9 mothers in the experimental group and 10 in the control group stopped breastfeeding before 4 month after inclusion
